## Correction

# Correction: Differentiation of *Bacillus pumilus* and *Bacillus safensis* Using MALDI-TOF-MS

The PLOS ONE Staff

Affiliation 4 and affiliation 5 are incorrectly switched. The affiliation for João Lopes should be: Departamento de Tecnologia Farmacêutica, Faculdade Farmácia, Universidade de Lisboa, Lisboa, Portugal. The affiliation for Manuela E. Pintado should be: CBQF, Centro de Biotecnologia e Química Fina, Escola Superior de Biotecnologia, Universidade Católica Portuguesa, Porto, Portugal.

The images for Figures 1 and 2 are incorrectly switched. The image that appears as Figure 1 should be Figure 2, and the image that appears as Figure 2 should be Figure 1. The figure legends appear in the correct order. Please view the correct images for Figure 1 and Figure 2 here.

**Citation:** The PLOS ONE Staff (2014) Correction: Differentiation of *Bacillus pumilus* and *Bacillus safensis* Using MALDI-TOF-MS. PLoS ONE 9(12): e116426. doi:10.1371/journal.pone.0116426

**Published:** December 19, 2014

**Copyright:** © 2014 The PLOS ONE Staff. This is an open-access article distributed under the terms of the Creative Commons Attribution License, which permits unrestricted use, distribution, and reproduction in any medium, provided the original author and source are credited.

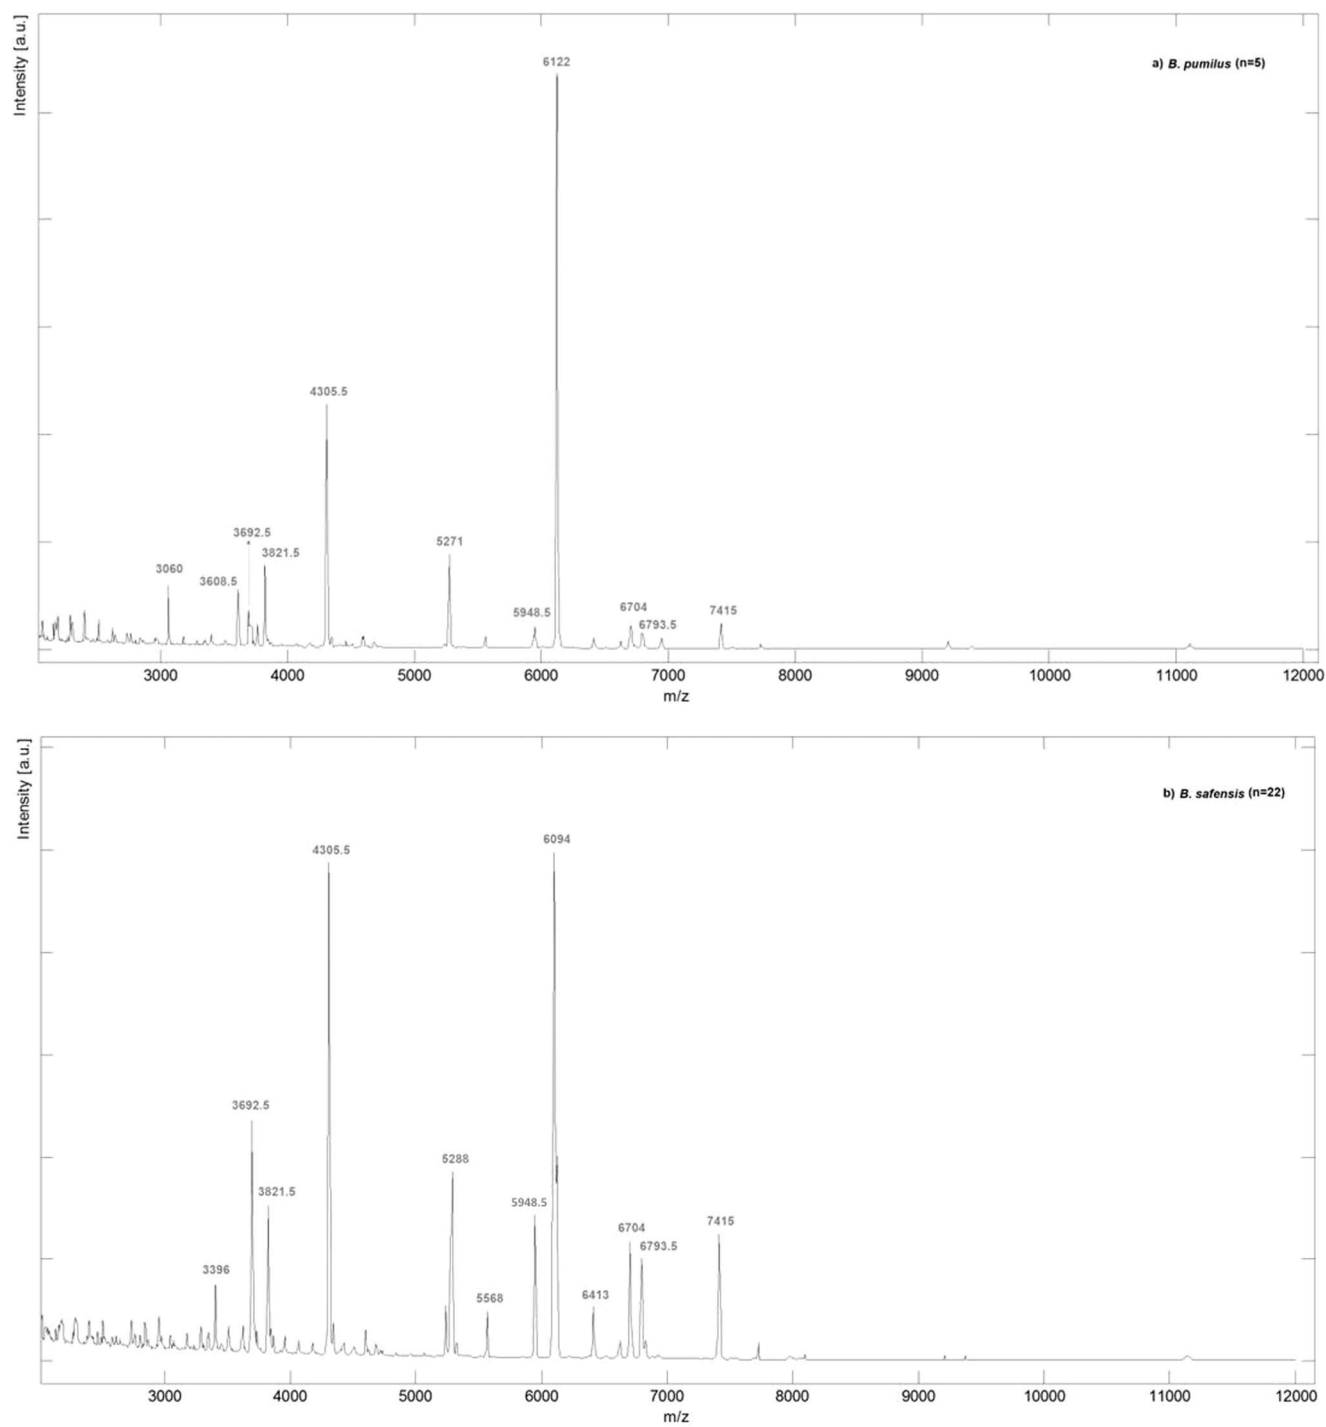

**Figure 1. Average mass spectra obtained by MALDI-TOF-MS analysis of *B. pumilus* and *B. safensis* isolates.** (a) *B. pumilus* (5 spectra) and (b) *B. safensis* (22 spectra) in the ion range  $m/z$  2000 to 12000. Spectra were obtained by averaging the respective experimental ion signals from all isolates.

doi:10.1371/journal.pone.0110127.g001

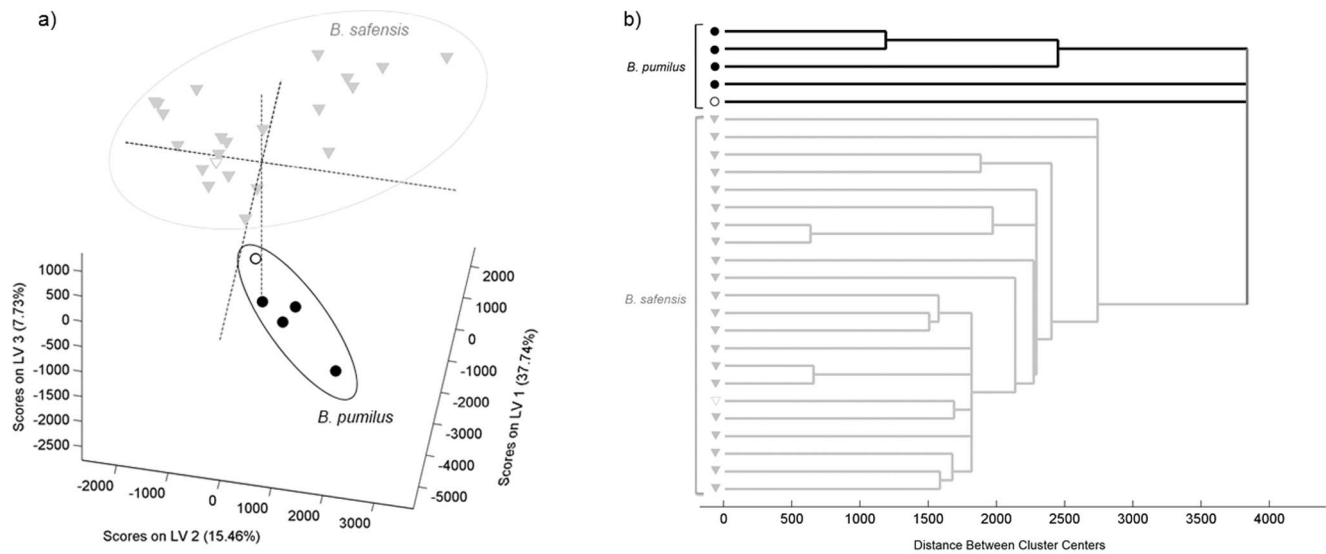

**Figure 2. Score plot obtained by PLSDA regression model and the corresponding dendrogram.** Score plot of the PLSDA regression model (a) and respective dendrogram (b), of *B. pumilus* and *B. safensis* isolates. Legend: ● *B. pumilus* isolates and ▼ *B. safensis* isolates. Unfilled symbols correspond to the type strains of both species.  
doi:10.1371/journal.pone.0110127.g002

## Reference

1. Branquinho R, Sousa C, Lopes J, Pintado ME, Peixe LV, et al. (2014) Differentiation of *Bacillus pumilus* and *Bacillus safensis* Using MALDI-TOF-MS. PLoS ONE 9(10): e110127. doi:10.1371/journal.pone.0110127
